# Supplementary material
Source: publisher figshare collection journal article supplement (https://acs.figshare.com/ndownloader/files/13037633)

Solid-Phase Synthesis of Phosphorothioate Oligonucleotides Using Sulfurization  
Byproducts for *in situ* Capping

Jimin Yang, Jessica A. Stolee,<sup>†</sup> Hong Jiang,<sup>†</sup> Li Xiao, William F. Kiesman, Firoz D. Antia,  
Yannick A. Fillon, Austen Ng, Xianglin Shi\*

Antisense Oligonucleotide Development and Manufacturing; <sup>†</sup>Analytical Development, Biogen,  
115 Broadway, Cambridge, MA 02142

Xianglin.shi@biogen.com

## Table of Contents

|                                                                                                                                               |     |
|-----------------------------------------------------------------------------------------------------------------------------------------------|-----|
| HPLC chromatograms and MS spectra.....                                                                                                        | S6  |
| Figure S1. A Representative Full-Scale UPLC UV Chromatogram (Crude DMT-on <b>9</b> ).....                                                     | S7  |
| Figure S2. A Representative Full-Scale Mass Spectrum of the Product Peak (Crude DMT-on <b>9</b> )<br>.....                                    | S7  |
| DMT-on phosphorothioate oligonucleotide <b>9</b> .....                                                                                        | S8  |
| Figure S3. UPLC UV chromatograms of crude DMT-on <b>9</b> synthesized with PADS as the<br>sulfurization agent.....                            | S8  |
| Figure S4. Overlaid MS spectra of crude DMT-on <b>9</b> synthesized with PADS as the sulfurization<br>agent.....                              | S9  |
| Figure S5. UPLC UV chromatograms of crude DMT-on <b>9</b> synthesized with ADTT as the<br>sulfurization agent.....                            | S9  |
| Figure S6. Overlaid MS spectra of crude DMT-on <b>9</b> synthesized with ADTT as the sulfurization<br>agent.....                              | S10 |
| DMT-on phosphorothioate oligonucleotide <b>10</b> .....                                                                                       | S11 |
| Figure S7. Overlaid UPLC UV Chromatograms and Mass Spectra of crude DMT-on <b>10</b><br>synthesized with ADTT as the sulfurization agent..... | S12 |

|                                                                                                                                                 |     |
|-------------------------------------------------------------------------------------------------------------------------------------------------|-----|
| Figure S8. Overlaid UPLC UV Chromatograms and Mass Spectra of crude DMT-on <b>10</b><br>synthesized with PADS as the sulfurization agent .....  | S13 |
| Figure S9. Overlaid UPLC UV Chromatograms and Mass Spectra of crude DMT-on <b>10</b><br>synthesized with DDTT as the sulfurization agent .....  | S14 |
| DMT-on phosphorothioate oligonucleotide <b>11</b> .....                                                                                         | S15 |
| Figure S10. Overlaid UPLC UV Chromatograms and Mass Spectra of crude DMT-on <b>11</b><br>synthesized with ADTT as the sulfurization agent ..... | S16 |
| Figure S11. Overlaid UPLC UV Chromatograms and Mass Spectra of crude DMT-on <b>11</b><br>synthesized with PADS as the sulfurization agent ..... | S17 |
| DMT-on phosphorothioate oligonucleotide <b>12</b> .....                                                                                         | S18 |
| Figure S12. Overlaid UPLC UV Chromatograms and Mass Spectra of crude DMT-on <b>12</b><br>synthesized with ADTT as the sulfurization agent ..... | S19 |
| Figure S13. Overlaid UPLC UV Chromatograms and Mass Spectra of crude DMT-on <b>12</b><br>synthesized with PADS as the sulfurization agent ..... | S20 |
| DMT-on phosphorothioate oligonucleotide <b>13</b> .....                                                                                         | S21 |
| Figure S14. Overlaid UPLC UV Chromatograms and Mass Spectra of crude DMT-on <b>13</b><br>synthesized with ADTT as the sulfurization agent ..... | S22 |
| DMT-on phosphorothioate oligonucleotide <b>14</b> .....                                                                                         | S23 |

|                                                                                                                                                                                                                                                          |     |
|----------------------------------------------------------------------------------------------------------------------------------------------------------------------------------------------------------------------------------------------------------|-----|
| Figure S15. Overlaid UPLC UV Chromatograms and Mass Spectra of crude DMT-on <b>14</b><br>synthesized with ADTT as the sulfurization agent .....                                                                                                          | S24 |
| Figure S16. Overlaid UPLC UV Chromatograms and Mass Spectra of crude DMT-on <b>14</b><br>synthesized with PADS as the sulfurization agent .....                                                                                                          | S25 |
| DMT-on phosphorothioate oligonucleotide <b>15</b> .....                                                                                                                                                                                                  | S26 |
| Figure S17. Overlaid RPIP HPLC UV chromatograms of the Crude DMT-on 15 Using PADS<br>.....                                                                                                                                                               | S26 |
| Figure S18. Overlaid MS spectra of Crude DMT-on <b>15</b> .....                                                                                                                                                                                          | S27 |
| NMR Experiments .....                                                                                                                                                                                                                                    | S28 |
| Esterification reaction of <i>n</i> -BuOH in the reaction mixture of P(OMe) <sub>3</sub> and PADS aged in the<br>presence of 3-picoline (1.0 equiv) .....                                                                                                | S28 |
| Figure S19. Partial <sup>1</sup> H NMR spectra (region 4.1-0.9 ppm) of the reaction mixture of <i>n</i> -BuOH<br>(1.0 equiv), P(OMe) <sub>3</sub> (1.0 equiv), PADS (1.0 equiv) aged with picoline (1.0 equiv) at different<br>reaction time points..... | S29 |
| Figure S20: Zoomed-in spectrum region (1.80-0.85 ppm) showing the signals of<br>CH <sub>3</sub> CH <sub>2</sub> CH <sub>2</sub> CH <sub>2</sub> - of BuOH and BuO <sub>2</sub> CCH <sub>2</sub> Ph. ....                                                 | S29 |
| Esterification reaction of <i>n</i> -BuOH in the reaction mixture of P(OMe) <sub>3</sub> and PADS aged in the<br>presence of NMI (1.0 equiv).....                                                                                                        | S31 |

Figure S21: Partial  $^1\text{H}$  NMR spectra (region 4.1-0.9 ppm) of the reaction mixture of n-BuOH (1.0 equiv),  $\text{P}(\text{OMe})_3$  (1.0 equiv), PADS (1.0 equiv) aged with NMI (1.0 equiv) at different reaction time points..... S32

Figure S22: Zoomed-in spectrum region for the signals of  $\text{CH}_3\text{CH}_2\text{CH}_2\text{CH}_2-$  of n-BuOH and  $\text{PhCH}_2\text{CO}_2\text{Bu}$ ..... S33

## HPLC chromatograms and MS spectra.

This section provides the UPLC-UV-MS chromatograms and spectra of the DMT-on products obtained from the syntheses with (4-reaction synthesis) and without (3-reaction synthesis) Ac<sub>2</sub>O capping step. Zoomed-in chromatograms and spectra are provided to show details of the failure sequences (the small peaks eluting before the main peaks) and the (n-1) impurities. For a visual inspection of product quality, a representative full-scale LC chromatogram and a mass spectrum of product peak of crude DMT-on **9** are provided in Figure S1 and S2, respectively.

When a reference sample was available, the DMT-on product yield was obtained by the UPLC-UV-MS analysis and reported. For other compounds that we do not have reference standards, overlaid mass spectra are provided for MS purity comparison and optical density per  $\mu\text{mol}$  measured at 260 nm (OD<sub>260</sub>) and UV purity were reported for yield comparison. The HRMS data of these compounds are also provided.

**Figure S1. A Representative Full-Scale UPLC UV Chromatogram (Crude DMT-on 9)**

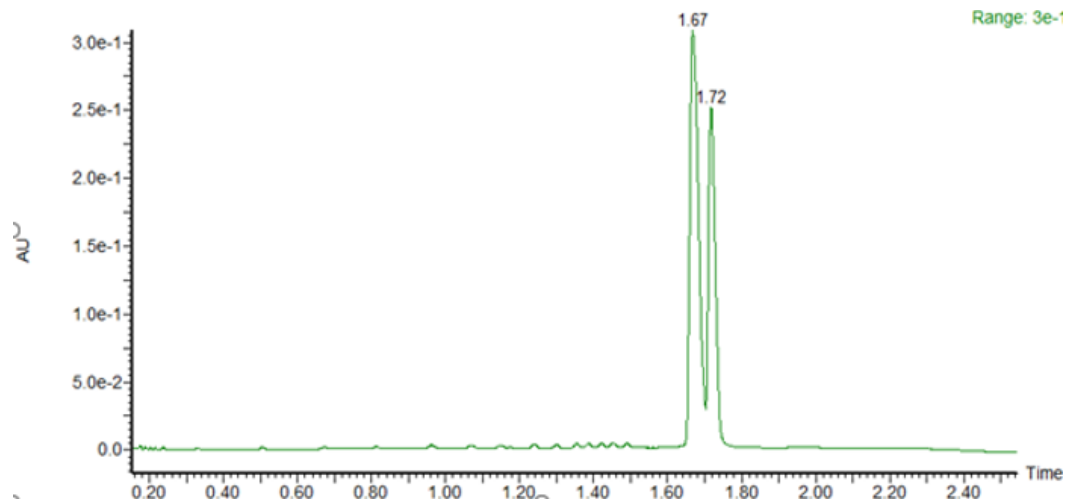

**Figure S2. A Representative Full-Scale Mass Spectrum of the Product Peak (Crude DMT-on 9)**

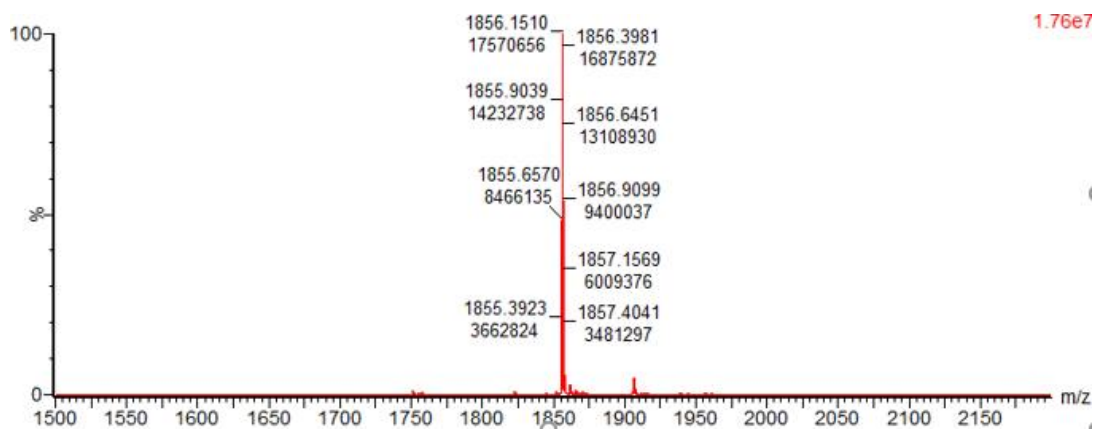

## DMT-on phosphorothioate oligonucleotide 9

Sequence:

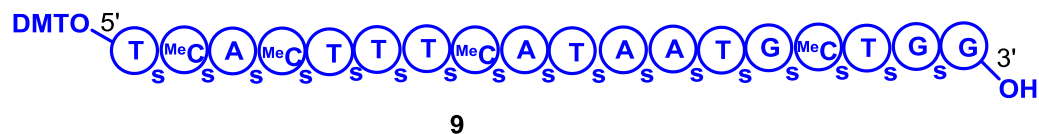

MeC = 5-Me Cytosine

s for PS linkage

a 18-mer 2' methoxyethoxy (MOE) ribose phosphorothioate oligonucleotide.

**Figure S3. UPLC UV chromatograms of crude DMT-on 9 synthesized with PADS as the sulfurization agent**

Black 3-reaction process; red: 4-reaction process

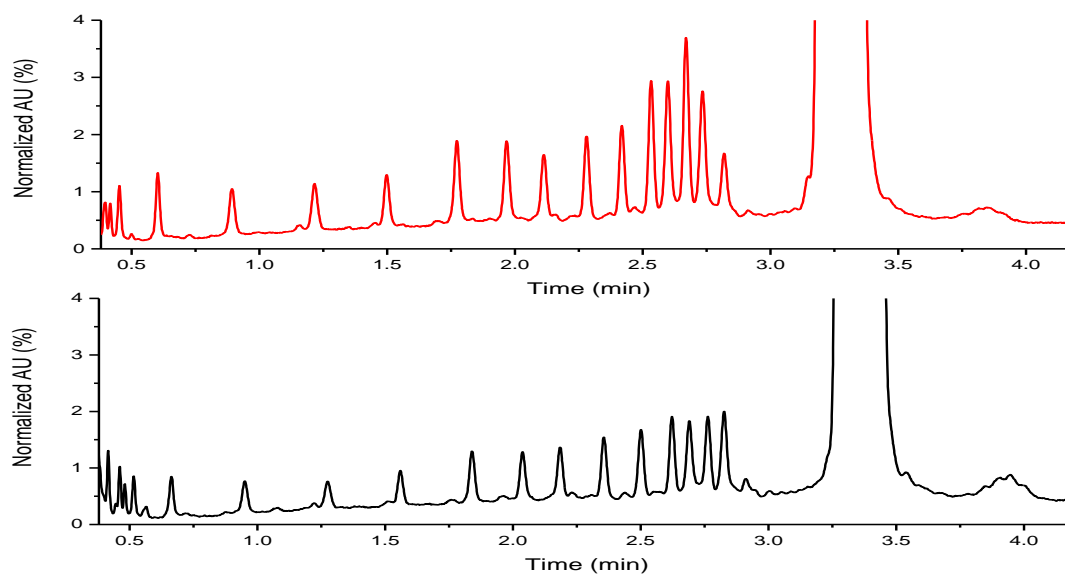



**Figure S4. Overlaid MS spectra of crude DMT-on 9 synthesized with PADS as the sulfurization agent**

Black: 3-reaction; Red: 4-reaction process

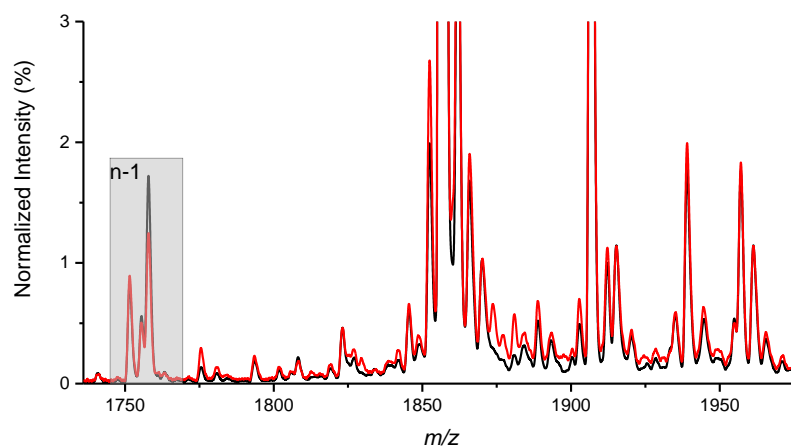

**Figure S5. UPLC UV chromatograms of crude DMT-on 9 synthesized with ADTT as the sulfurization agent**

Black: 3-reaction with ADTT; Red: 4-reaction process with PADS

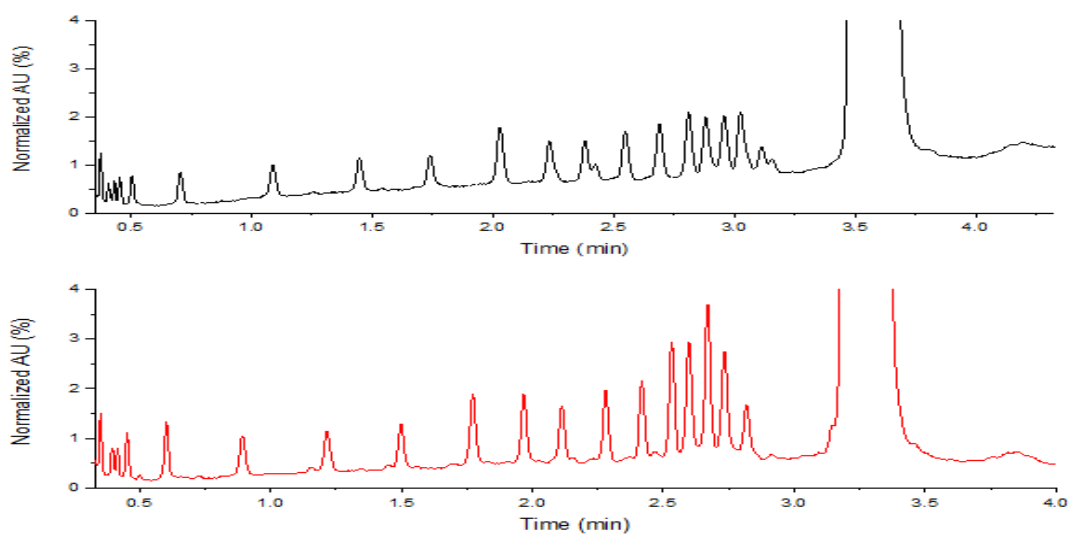

**Figure S6. Overlaid MS spectra of crude DMT-on 9 synthesized with ADTT as the sulfurization agent**

Black: 3-reaction with ADTT; Red: 4-reaction process (with PADS as the sulfurization agent)

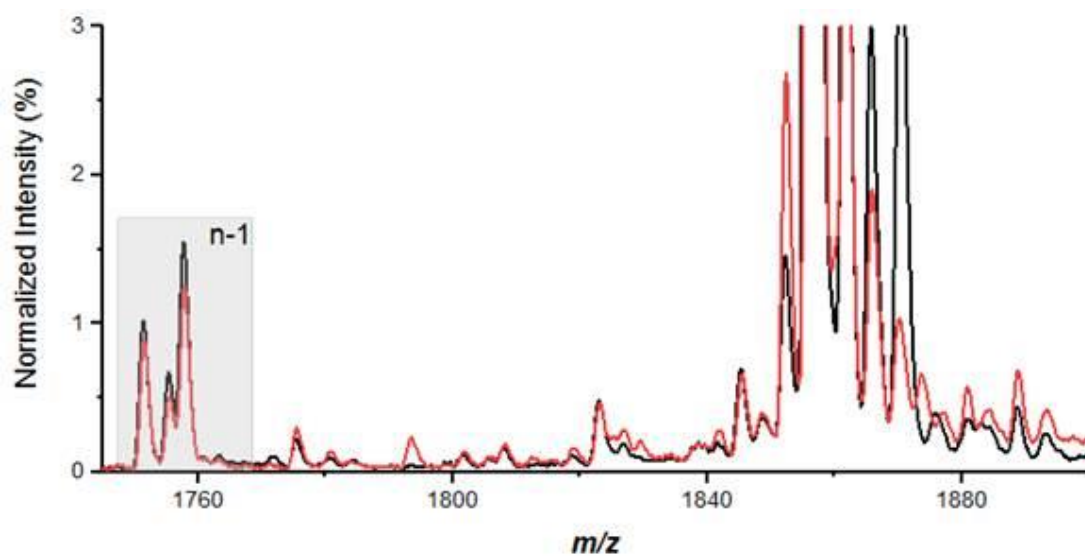

## DMT-on phosphorothioate oligonucleotide 10

Sequence:

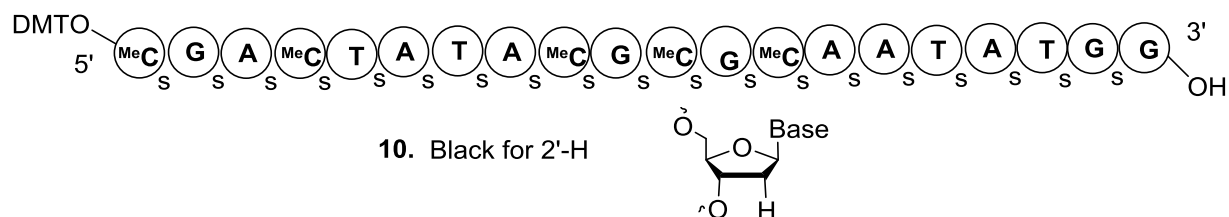

a 20-mer 2'H ribose phosphorothioate oligonucleotide

n-1 impurities appear between m/z: 1613- 1620.

**Figure S7. Overlaid UPLC UV Chromatograms and Mass Spectra of crude DMT-on 10 synthesized with ADTT as the sulfurization agent**

Black: 3-reaction; Red: 4-reaction process

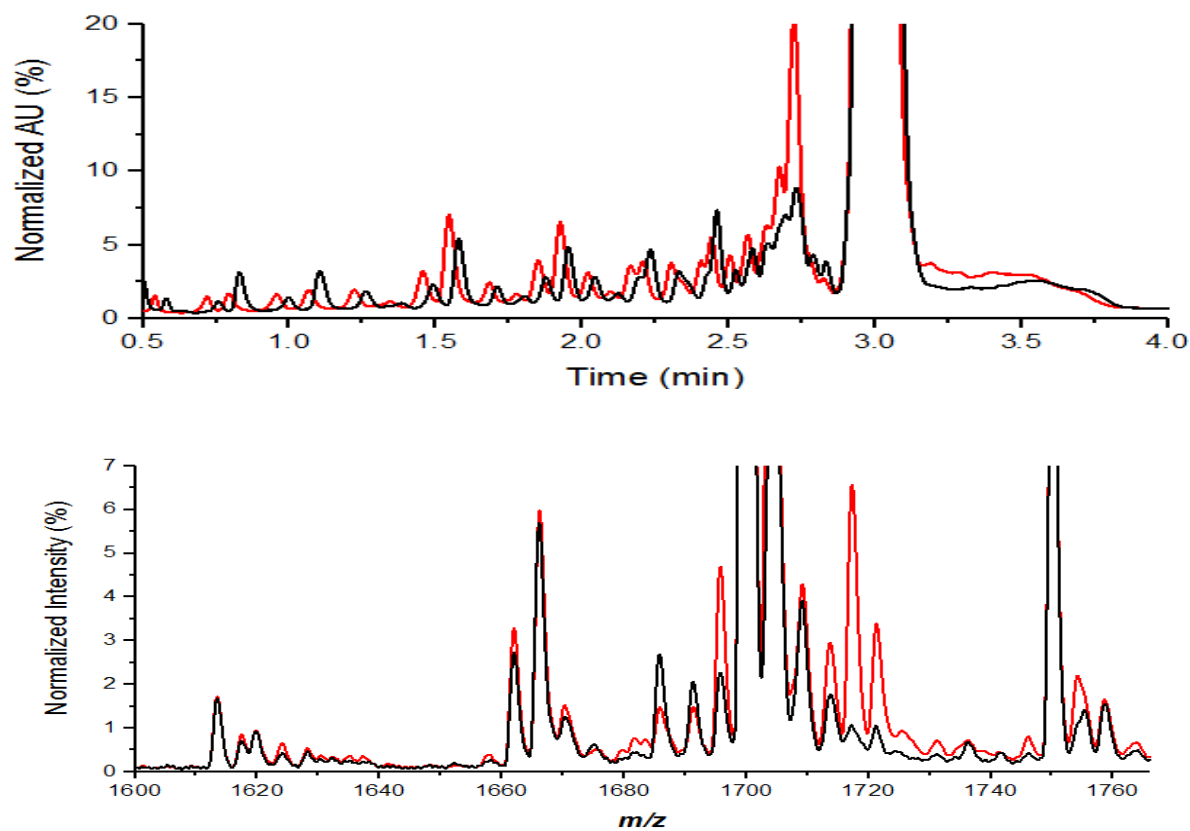

**Figure S8. Overlaid UPLC UV Chromatograms and Mass Spectra of crude DMT-on 10 synthesized with PADS as the sulfurization agent**

Black: 3-reaction; Red: 4-reaction process

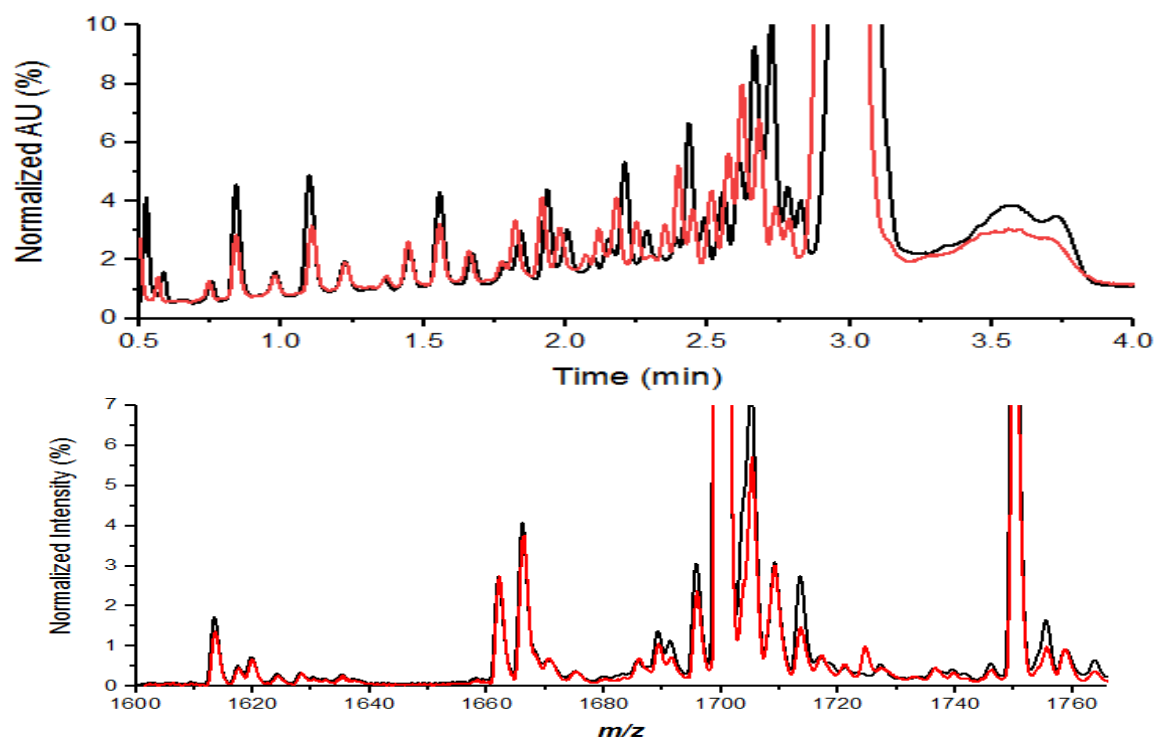

**Figure S9. Overlaid UPLC UV Chromatograms and Mass Spectra of crude DMT-on 10 synthesized with DDTT as the sulfurization agent**

Black: 3-reaction; Red: 4-reaction process

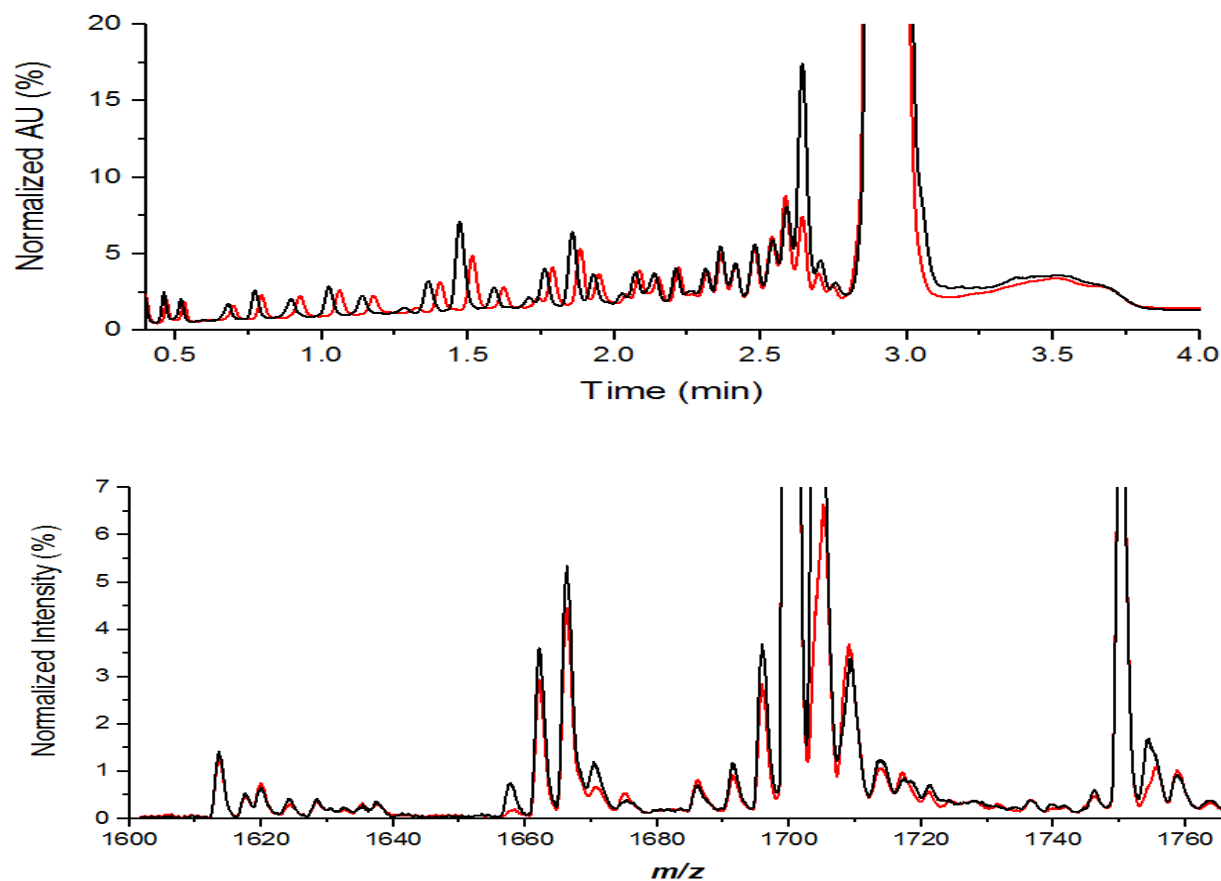

## DMT-on phosphorothioate oligonucleotide 11

Sequence:

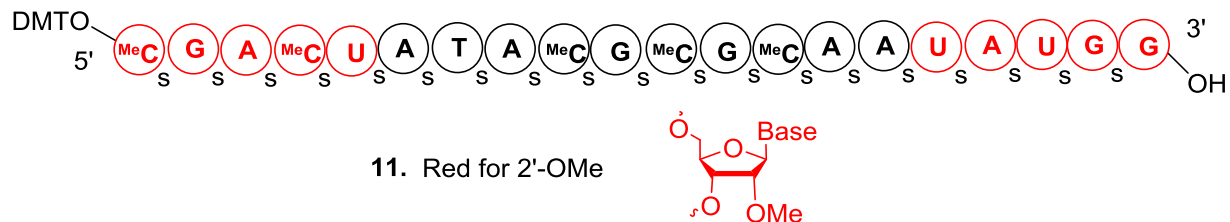

a 20-mer 2'H (black) and 2' OMe (red) ribose phosphorothioate oligonucleotide

n-1 impurities appear between m/z: 1671-1690.

**Figure S10. Overlaid UPLC UV Chromatograms and Mass Spectra of crude DMT-on 11 synthesized with ADTT as the sulfurization agent**

Black: 3-reaction; Red: 4-reaction process

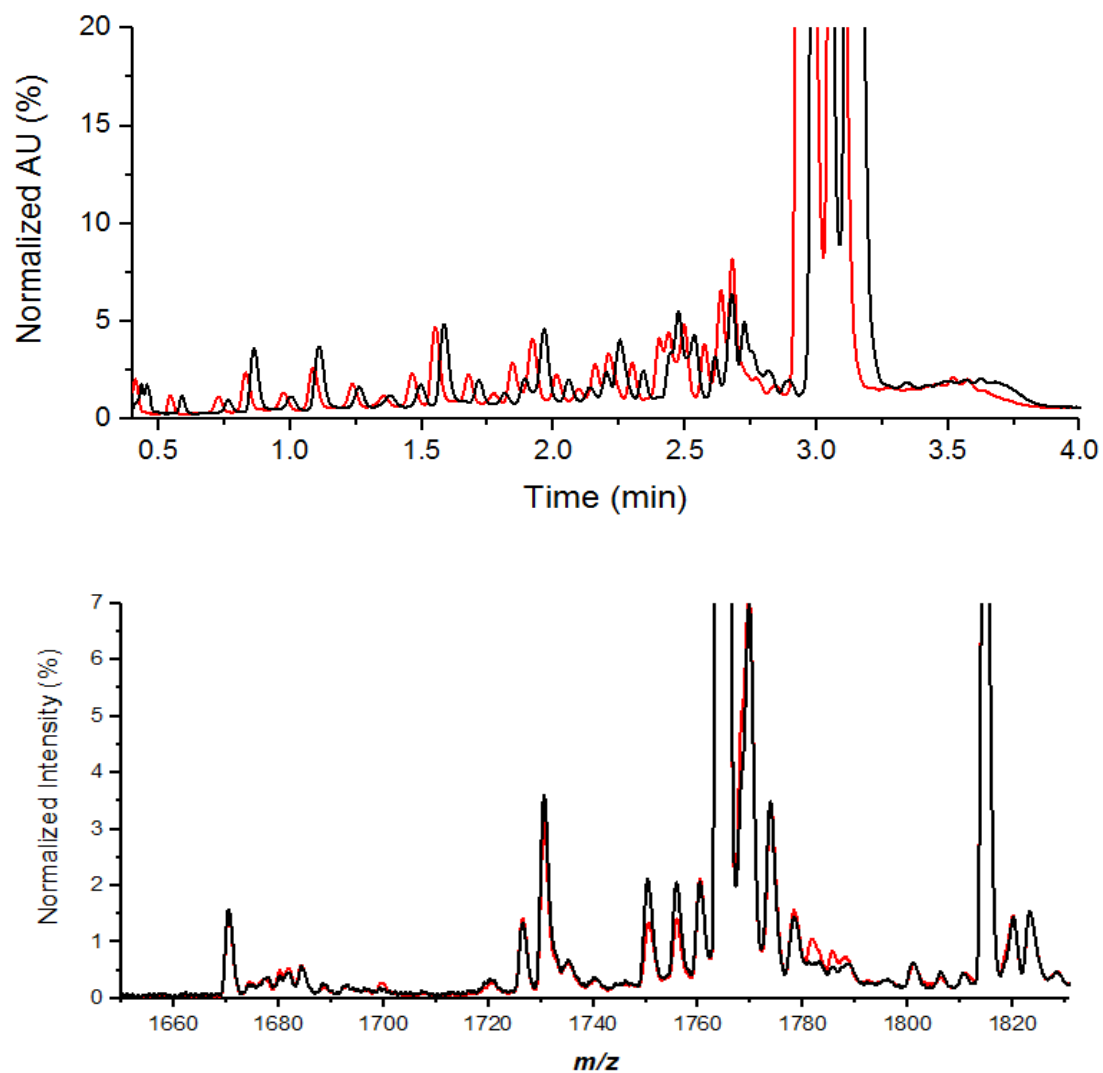



**Figure S11. Overlaid UPLC UV Chromatograms and Mass Spectra of crude DMT-on 11 synthesized with PADS as the sulfurization agent**

Black: 3-reaction; Red: 4-reaction process

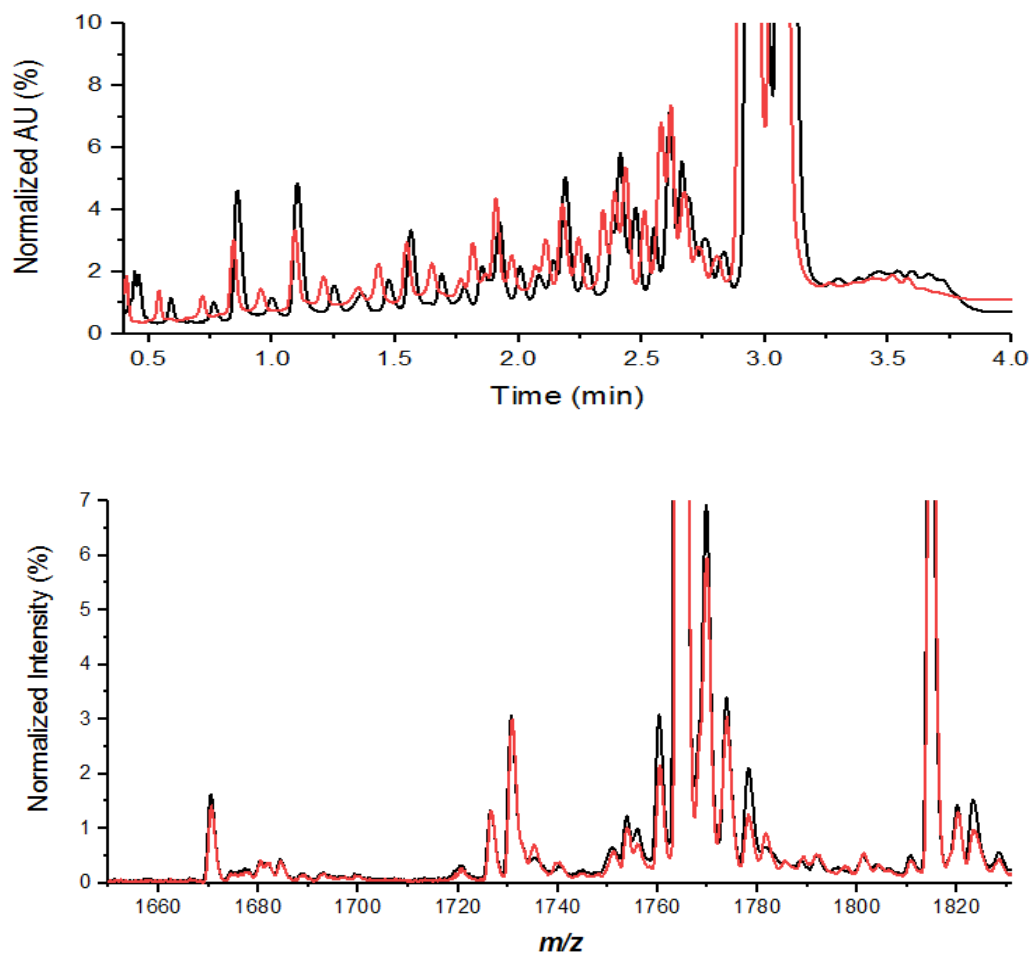

## DMT-on phosphorothioate oligonucleotide 12

Sequence:

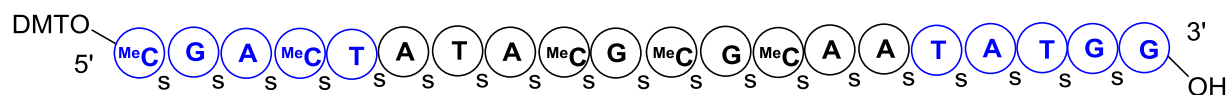

**12.** Blue for 2'  
OCH<sub>2</sub>CH<sub>2</sub>OMe (MOE)

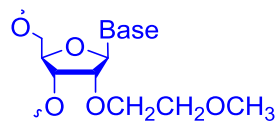

a 20-mer 2'H (black) and 2' methoxyethoxy (MOE) (blue) ribose phosphorothioate oligonucleotide

n-1 impurities appear between m/z: 1780-1804.

**Figure S12. Overlaid UPLC UV Chromatograms and Mass Spectra of crude DMT-on 12 synthesized with ADTT as the sulfurization agent**

Black: 3-reaction; Red: 4-reaction process

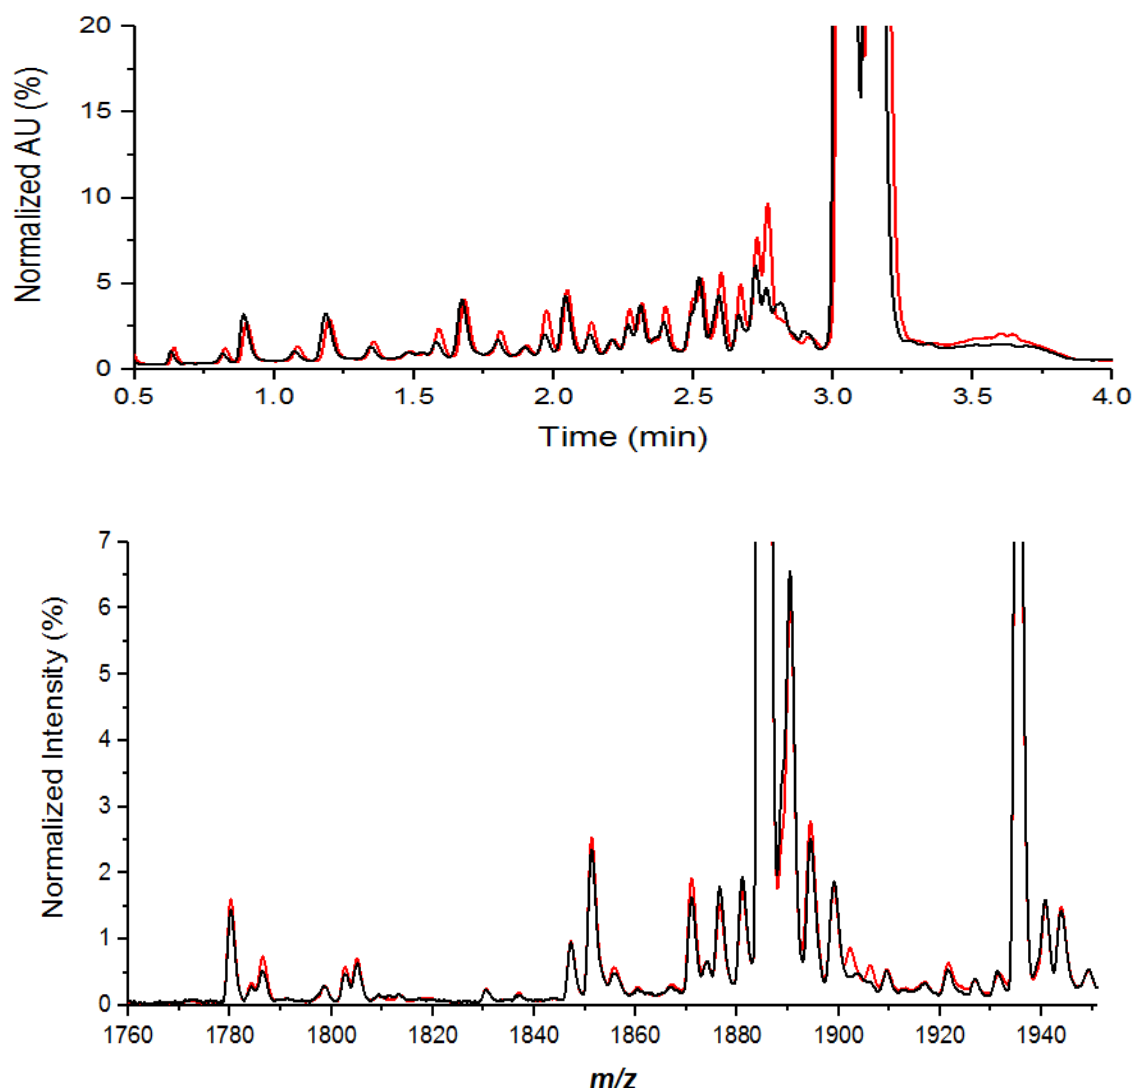

**Figure S13. Overlaid UPLC UV Chromatograms and Mass Spectra of crude DMT-on 12 synthesized with PADS as the sulfurization agent**

Black: 3-reaction; Red: 4-reaction process

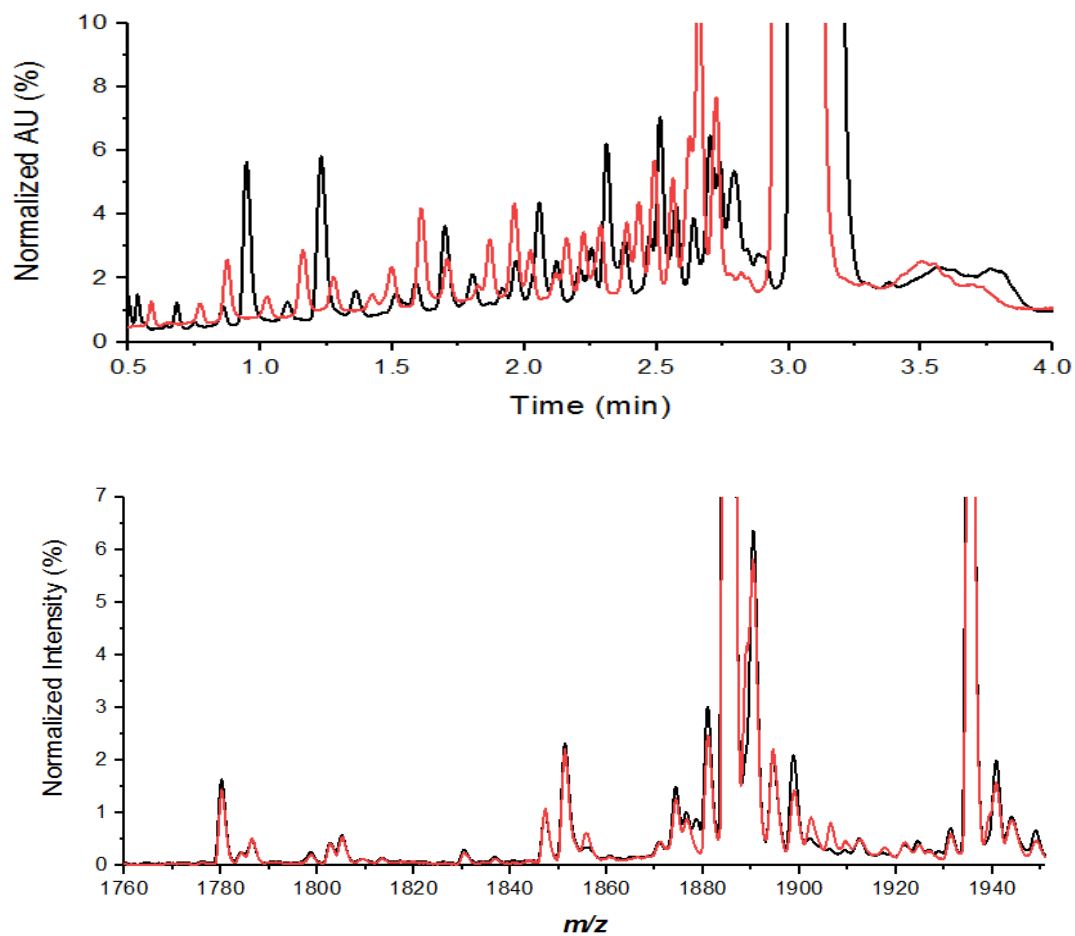

## DMT-on phosphorothioate oligonucleotide 13

Sequence:

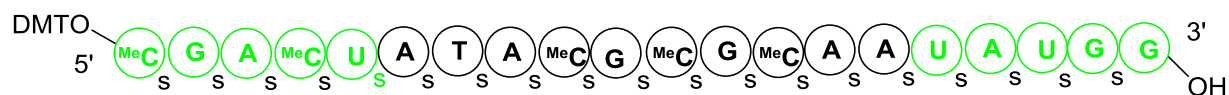

13. Green for cEt modification

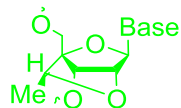

a 20-mer 2'H (black) and 2' cEt (green) ribose phosphorothioate oligonucleotide

cEt ribose

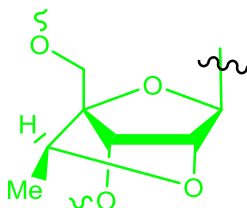

n-1 impurities appear between m/z: 1699-1718.

**Figure S14. Overlaid UPLC UV Chromatograms and Mass Spectra of crude DMT-on 13 synthesized with ADTT as the sulfurization agent**

Black: 3-reaction; Red: 4-reaction process

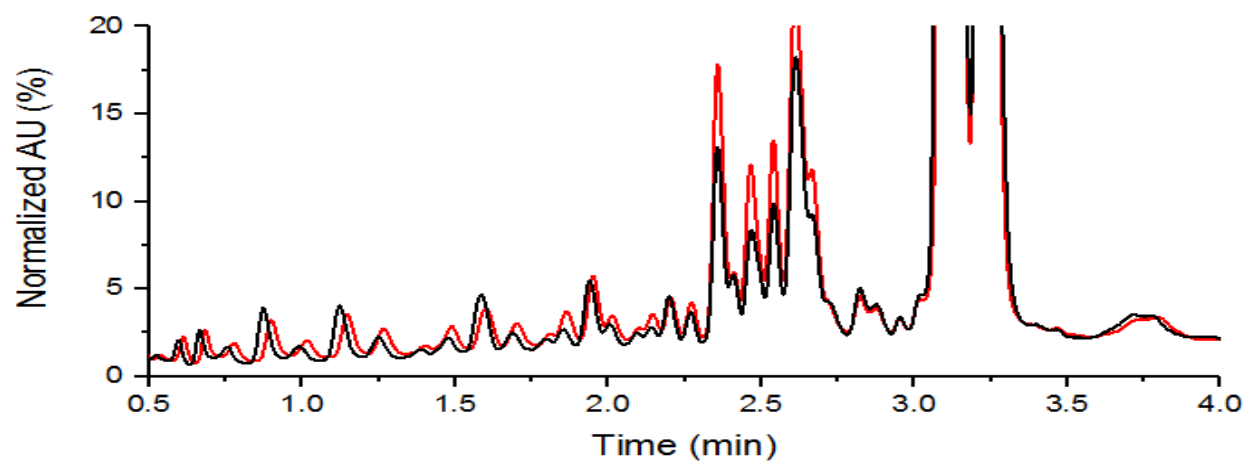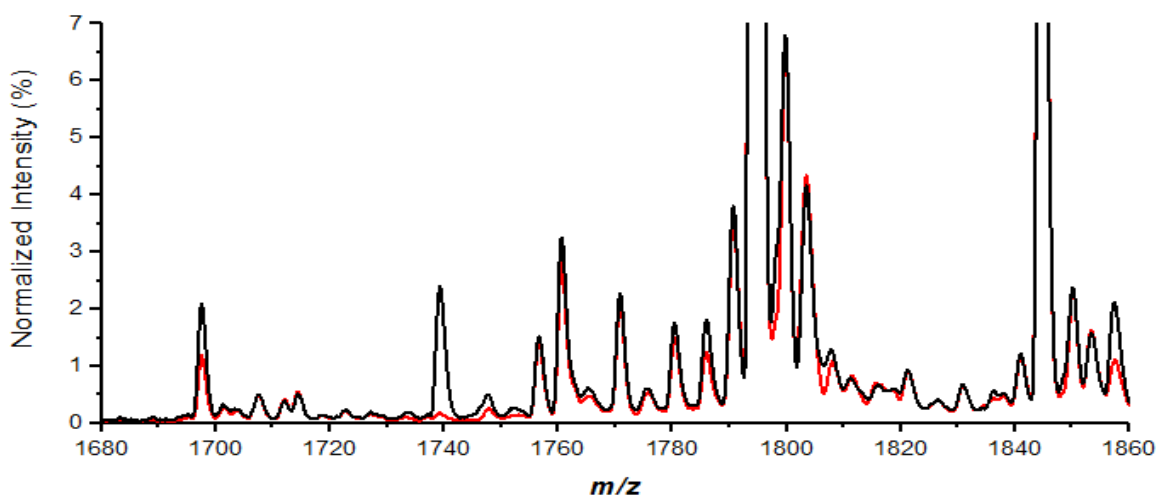

## DMT-on phosphorothioate oligonucleotide 14

Sequence:

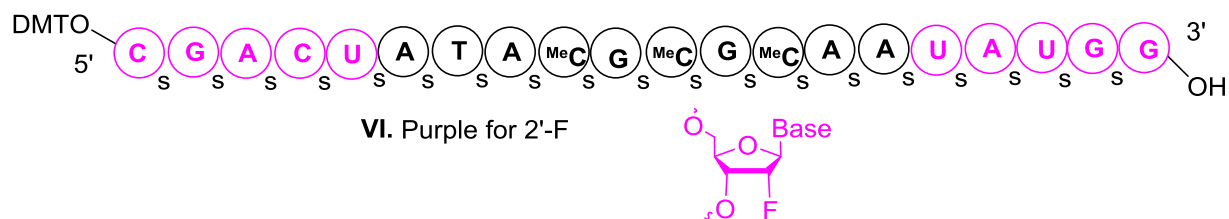

a 20-mer 2'-H (black) and 2'-F (purple) ribose phosphorothioate oligonucleotide

n-1 impurities appear between m/z: 1636- 1645.

**Figure S15. Overlaid UPLC UV Chromatograms and Mass Spectra of crude DMT-on 14 synthesized with ADTT as the sulfurization agent**

Black: 3-reaction; Red: 4-reaction process

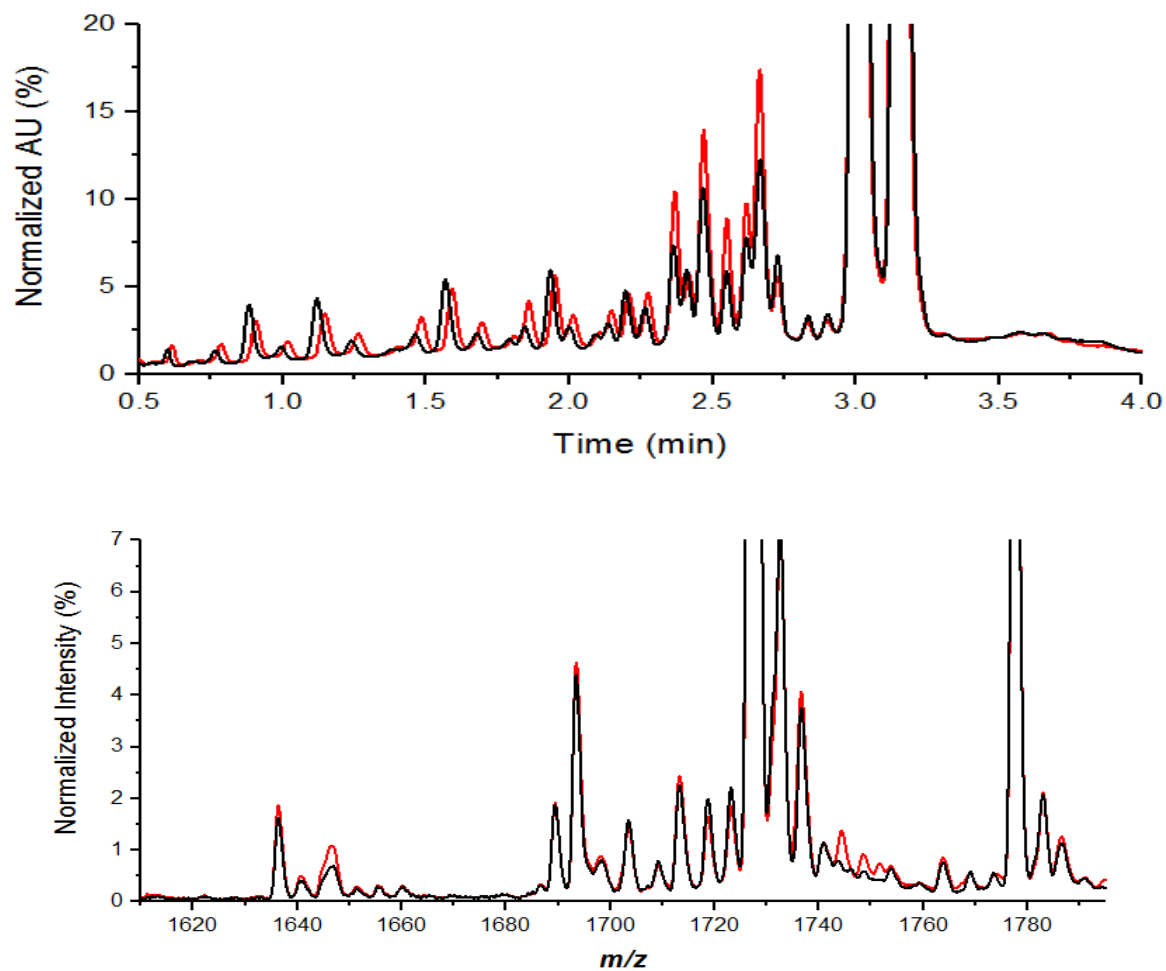



**Figure S16. Overlaid UPLC UV Chromatograms and Mass Spectra of crude DMT-on 14 synthesized with PADS as the sulfurization agent**

Black: 3-reaction; Red: 4-reaction process

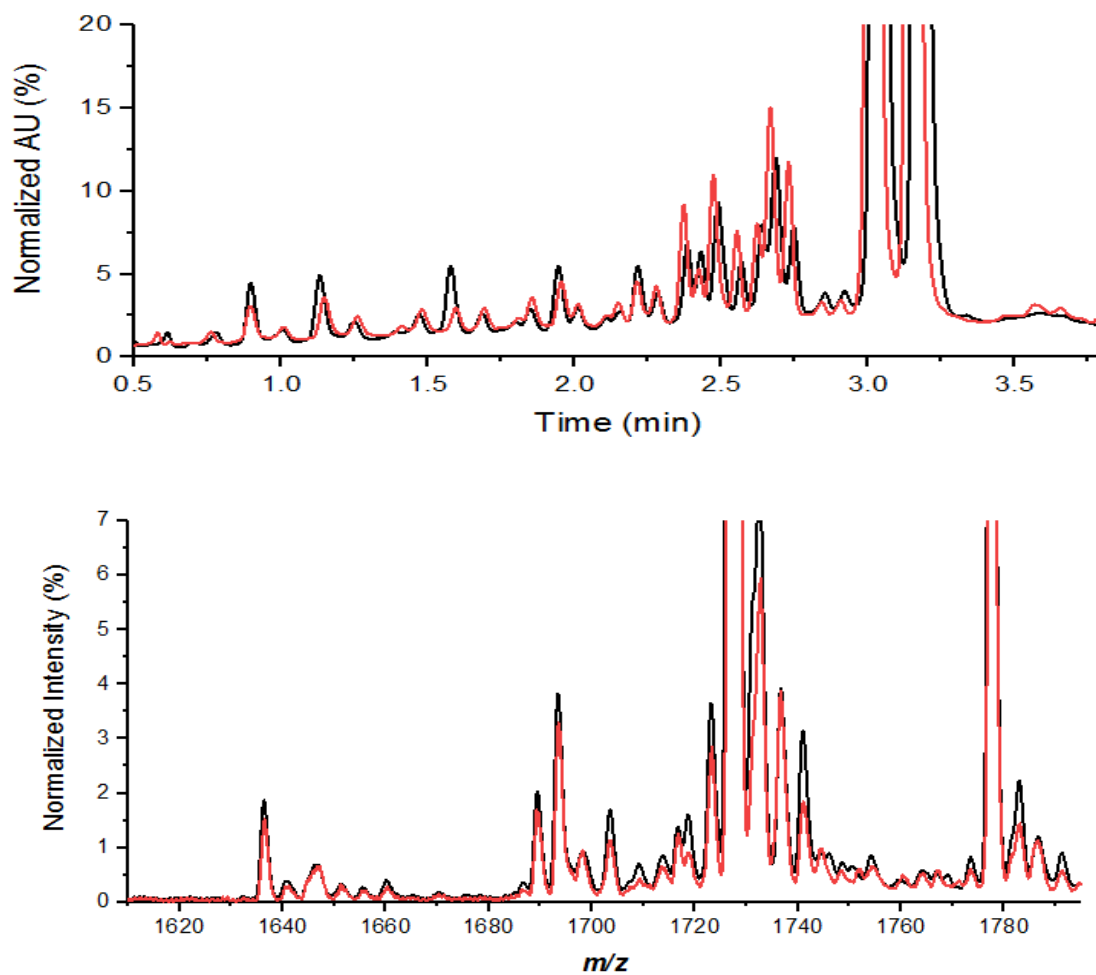

## DMT-on phosphorothioate oligonucleotide 15

### Sequence:

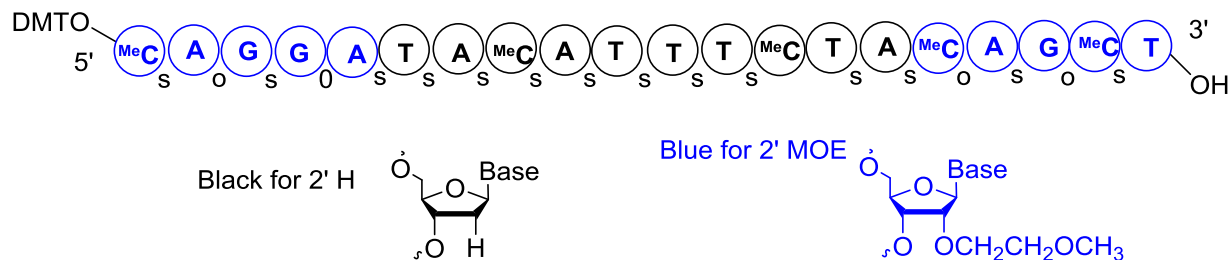

15. s for PS linkage and o for PO linkage

a 20-mer 2' H (black) and 2' MOE (blue) ribose oligonucleotide; s: PS linkage, o: PO linkage

PADS used as sulfurization agent.

(n-1) impurities appear between m/z: 1750–1784

**Figure S17. Overlaid RPIP HPLC UV chromatograms of the Crude DMT-on 15 Using PADS**

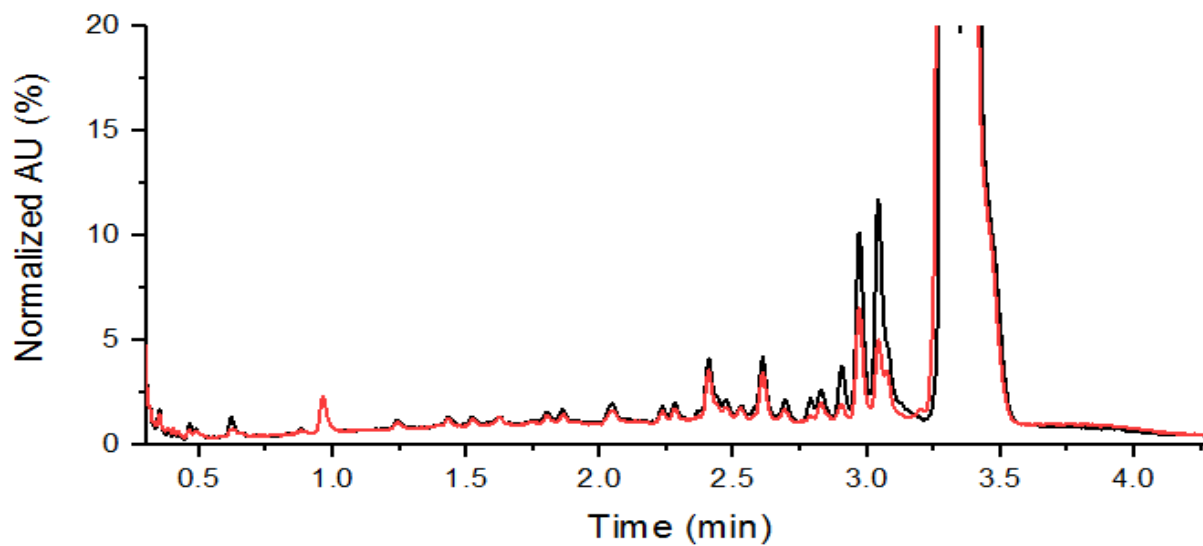

**Figure S18. Overlaid MS spectra of Crude DMT-on 15**

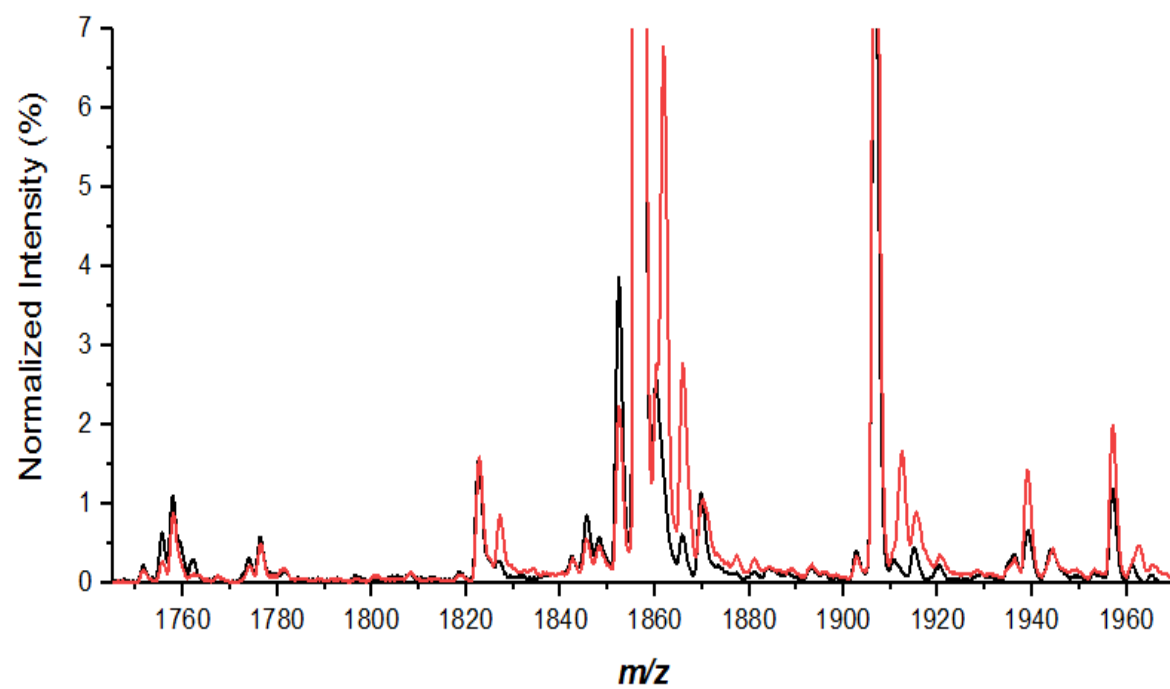

## NMR Experiments

Esterification reaction of *n*-BuOH in the reaction mixture of P(OMe)<sub>3</sub> and PADS aged in the presence of 3-picoline (1.0 equiv)

**Scheme S1: Conversion of *n*-BuOH into PhCH<sub>2</sub>CO<sub>2</sub>Bu during the Sulfurization of P(OMe)<sub>3</sub> with PADS Aged in 3-Picoline**

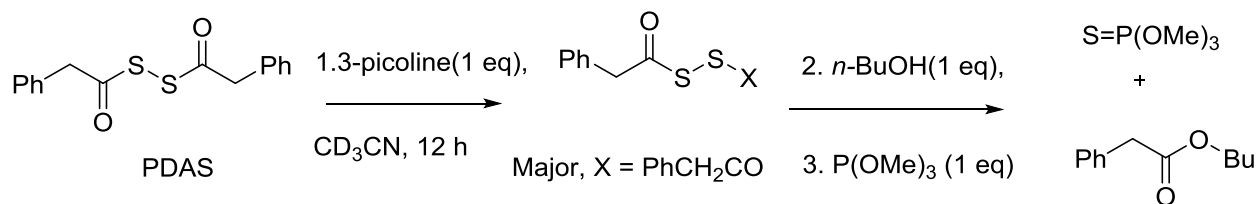

**Figure S19** and **Figure S20** show the full and partial spectra obtained at different times. From the spectra, the ratios of *n*-BuOH to PhCH<sub>2</sub>CO<sub>2</sub>Bu at the corresponding reaction times were obtained and listed in **Table S1**.

**Figure S19.** Partial  $^1\text{H}$  NMR spectra (region 4.1-0.9 ppm) of the reaction mixture of n-BuOH (1.0 equiv),  $\text{P}(\text{OMe})_3$  (1.0 equiv), PADS (1.0 equiv) aged with picoline (1.0 equiv) at different reaction time points.

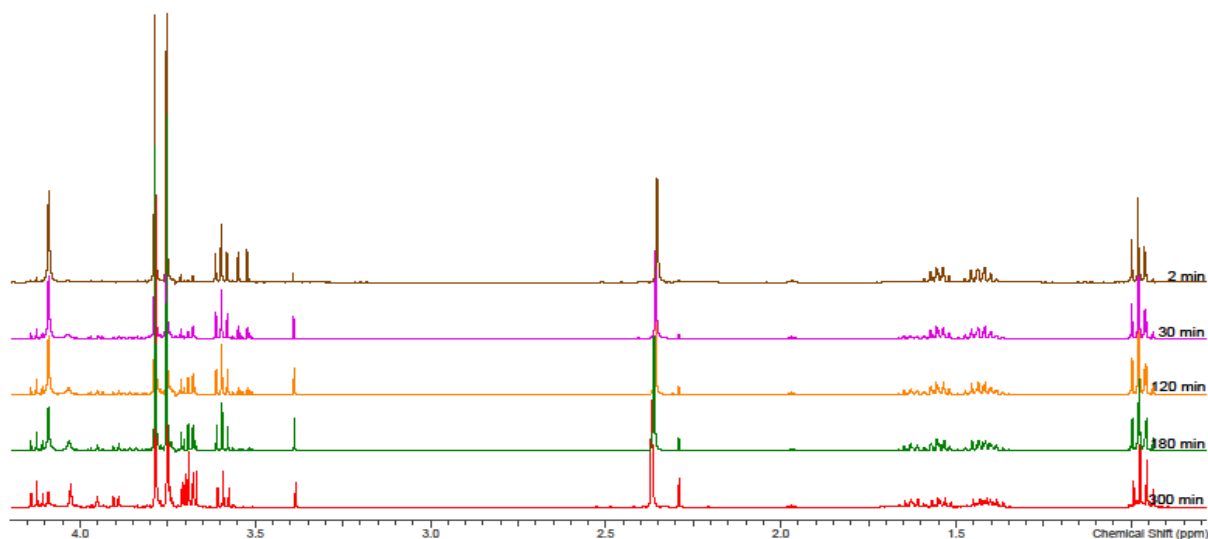

**Figure S20:** Zoomed-in spectrum region (1.80-0.85 ppm) showing the signals of  $\text{CH}_3\text{CH}_2\text{CH}_2\text{CH}_2-$  of BuOH and  $\text{BuO}_2\text{CCH}_2\text{Ph}$ .

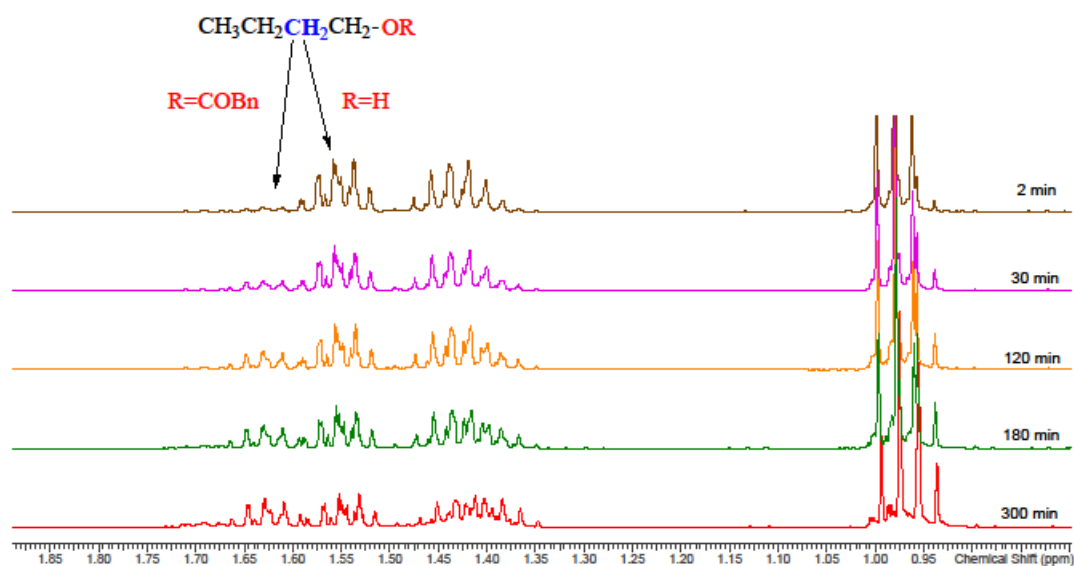

The P(OMe)<sub>3</sub> (doublet at ~3.55 ppm) is very quickly sulfurized to S=P(OMe)<sub>3</sub> (doublet at 3.75 ppm). The *n*-BuOH is progressively esterified as shown by the decrease of -CH<sub>2</sub>OH (t, 3.6 ppm) and increase of -CH<sub>2</sub>OCO- (t, 4.1 ppm) signals.

**Table S1. Ratios of *n*-BuOH : PhCH<sub>2</sub>CO<sub>2</sub>Bu**

| Time   | <i>n</i> -BuOH : PhCH <sub>2</sub> CO <sub>2</sub> Bu <sup>a</sup> |
|--------|--------------------------------------------------------------------|
| 2 min  | 100 : 0                                                            |
| 30 min | 89 : 11                                                            |
| 1 h    | 85 : 15                                                            |
| 3 h    | 74 : 26                                                            |
| 5 h    | 71 : 29                                                            |

<sup>a</sup> Ratios were calculated by <sup>1</sup>H integration: δ 1.48-1.55 (m, 2H) for *n*-BuOH, δ 1.57-1.65 (m, 2H) for PhCH<sub>2</sub>CO<sub>2</sub>Bu.

**Esterification reaction of *n*-BuOH in the reaction mixture of P(OMe)<sub>3</sub> and PADS aged in the presence of NMI (1.0 equiv)**

**Scheme S2: Conversion of *n*-BuOH into PhCH<sub>2</sub>CO<sub>2</sub>Bu during the Sulfurization of P(OMe)<sub>3</sub> with PADS Aged in NMI**

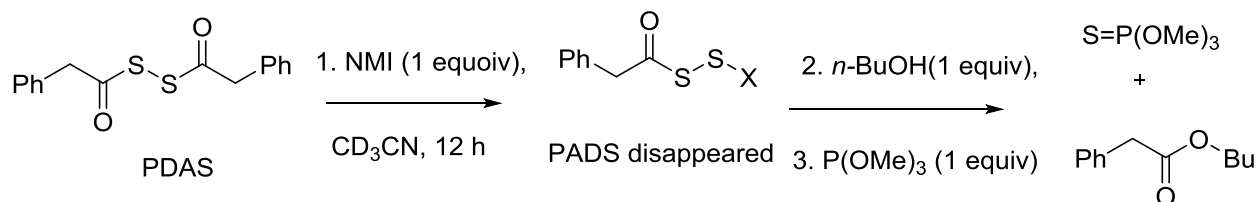

In this reaction, sulfurized of P(OMe)<sub>3</sub> (doublet at ~3.55 ppm) stalled quickly with about half of P(OMe)<sub>3</sub> was converted into S=P(OMe)<sub>3</sub> (doublet at 3.75 ppm). This result indicates the sulfurization reaction is fast and is consistent with literature data that PADS generates less than one equivalent of active sulfurization species. The *n*-BuOH is progressively esterified as shown by the decrease of -CH<sub>2</sub>OH (t, 3.6 ppm) and increase of -CH<sub>2</sub>OCO- (t, 4.1 ppm) signals.

**Figure S21** and **Figure S22** show the full and partial spectra obtained at different times.

**Figure S21: Partial  $^1\text{H}$  NMR spectra (region 4.1-0.9 ppm) of the reaction mixture of n-BuOH (1.0 equiv),  $\text{P}(\text{OMe})_3$  (1.0 equiv), PADS (1.0 equiv) aged with NMI (1.0 equiv) at different reaction time points.**

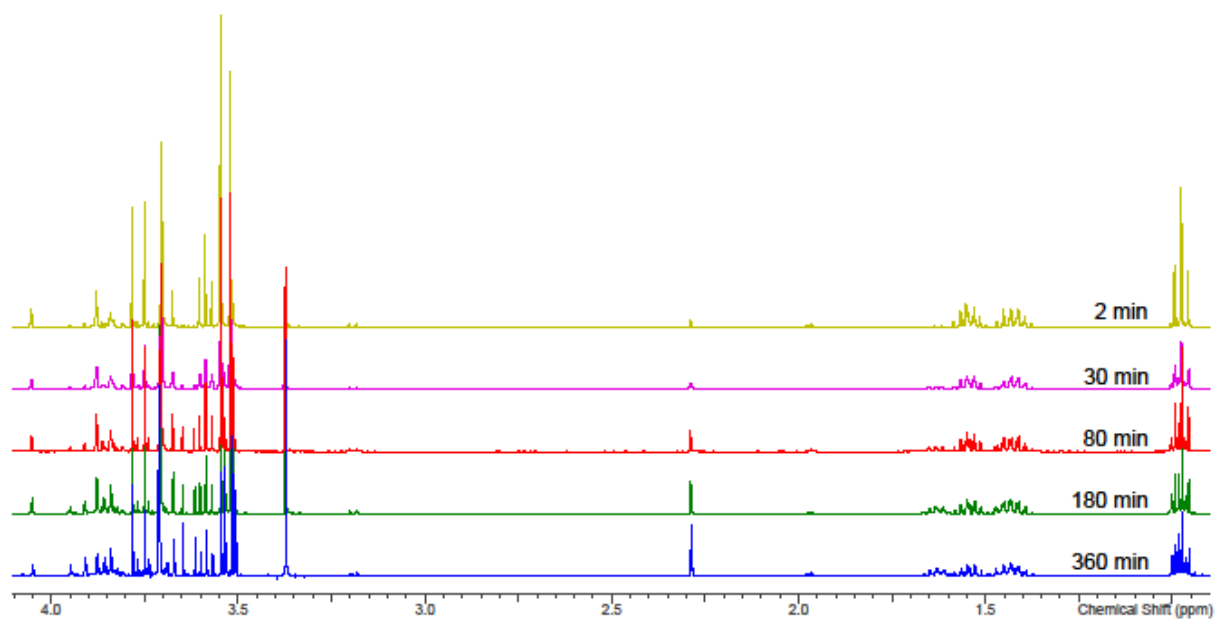



**Figure S22: Zoomed-in spectrum region for the signals of  $\text{CH}_3\text{CH}_2\text{CH}_2\text{CH}_2\text{-}$  of n-BuOH and  $\text{PhCH}_2\text{CO}_2\text{Bu}$ .**

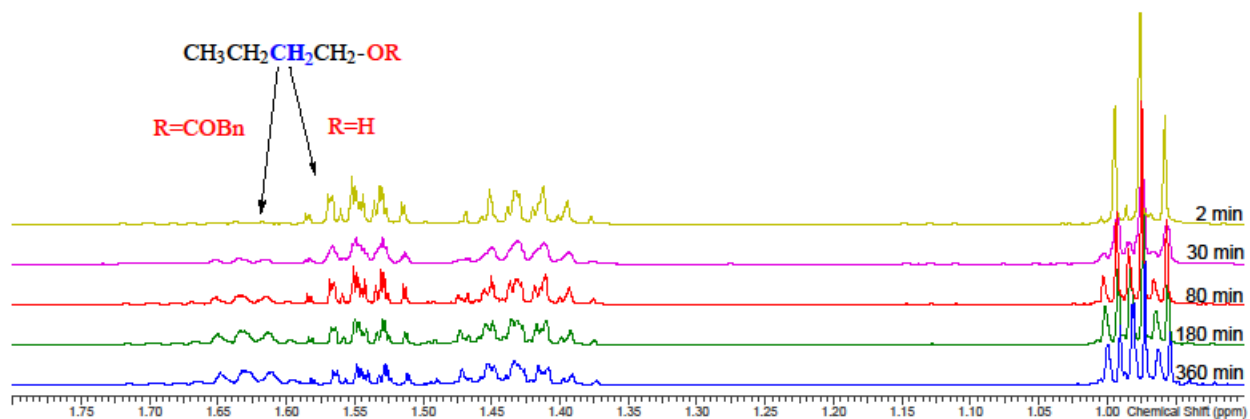

Supplement: Supplementary file 1 [file 13037633]
